# Supplementary material
Source: MDPI journal article supplement (https://www.mdpi.com/2073-4395/12/2/484)
Supplement: s1 [file s1]

## Supplementary Methods

### *Determination of sorbitol content*

Sorbitol contents were determined by gas chromatography-mass spectrometer (GC-MS) following the protocol described by Bartolozzi, *et al.* [1]. In detail, 0.3 g of phloem sap and leaf was dissolved in 1 ml of 80 % methanol. The mixture was incubated in a water bath at 70 °C for 30 min, followed by ultrasonic treatment for 45 min, and then centrifuged at 3000 rpm for 20 min. After centrifugation supernatant was collected in a 5 ml round bottom flask and the above-followed extraction was repeated twice. Afterwards, 0.1 ml of internal standard solution (2.5% methyl- $\alpha$ -D-glucose) was added and final volume was achieved by 80 % methanol. The solution was taken into a 10 ml Eppendorf tube and centrifugation at 12000rpm for 30 min, and 0.5 ml of supernatant was sampled into a 2 ml Eppendorf tube and evaporated at 60 °C for 2 h. The residue was dissolved in 0.8 ml of hydroxylamine hydrochloride solution in pyridine (20 mg/ml), incubated at 75 °C for 1 h, and then cooled to room temperature. Subsequently, 0.4 ml of hexamethyldisilazane and 0.2 ml of trimethylchlorosilane were added and the mixture was incubated at 70 °C for 2 h. The samples were then kept overnight at room temperature, followed by centrifugation at 12000 rpm for 30 min. The supernatant was then subjected to gas chromatography analysis using GC-MS Ultra-ITQ1100 autosampler (Thermo-Fisher, USA).

### Reference

1. Bartolozzi, F.; Bertazza, G.; Bassi, D.; Cristoferi, G. Simultaneous determination of soluble sugars and organic acids as their trimethylsilyl derivatives in apricot fruits by gas-liquid chromatography. *Journal of chromatography A* **1997**, 758, 99-107.

**Table S1** Comparison of nutrients concentration in bud samples (normal bud and wizened bud), and soil samples (orchard soil and normal range).

| Nutrients  | Bud             |                 | Soil          |              |
|------------|-----------------|-----------------|---------------|--------------|
|            | Normal bud      | Wizened bud     | Orchard Soil  | Normal range |
| N (mg/kg)  | 10076.76±275.74 | 10027.47±117.79 | 64.46±7.80    | 45<          |
| P (mg/kg)  | 1494.52±45.56   | 1297.12±148.88  | 32.34±4.80    | 20-75        |
| K (mg/kg)  | 7082.73±160.38* | 4271.43±239.13  | 221.81±23.10  | 50-300       |
| Ca (mg/kg) | 9705.66±117.31  | 9542.44±1425.10 | 1352.74±88.87 | 1000-2000    |
| Mg (mg/kg) | 2038.48±27.14*  | 1419.21±99.35   | 206.24±13.63• | 60-180       |
| S (mg/kg)  | 459.39±5.70     | 439.53±26.61    | 111.72±3.05   | <240         |
| Fe (mg/kg) | 34.88±6.79      | 33.60±9.54      | 31.81±1.64    | 5-50         |
| Mn (mg/kg) | 57.00±3.81      | 58.58±1.13      | 35.53±6.57    | 8-50         |
| B (mg/kg)  | 40.86±1.02*     | 20.93±1.37      | 0.19±0.02•    | 0.5-2        |
| Cu (mg/kg) | 29.42±1.55      | 29.64±0.93      | 3.60±0.66     | 1-12         |
| Zn (mg/kg) | 40.55±0.20      | 40.62±2.39      | 2.86±0.22     | 3-20         |

Values are means of three replicates ±SD. “\*” in each table cell indicates significant differences between normal bud and wizened bud (*t*-test, *P*<0.05). “•” in each table cell indicates the nutrient concentration of soil is out of the normal range. C/N: the ratio of total carbon concentration and total nitrogen concentration.

**Table S2** The gene names and corresponding gene IDs in this study, and primers designed for qRT-PCR validation.

| Gene name          | Gene ID        | Primer sequence       |
|--------------------|----------------|-----------------------|
| <i>PpySDH</i>      | Ppy07g2595.1-F | AGCCGCTTATTACTCACC    |
|                    | Ppy07g2595.1-R | GCTTCCACAAATGCCTAC    |
| <i>PpyPL18.1</i>   | Ppy14g1420.1-F | ATCCACGGACTGAACATACA  |
|                    | Ppy14g1420.1-R | CGCATCAATCAACCCATC    |
| <i>PpyPG1</i>      | Ppy02g2733.1-F | GATTCCCAGGCATTACG     |
|                    | Ppy02g2733.1-R | TTGGCTTCAGTTGATAGACC  |
| <i>PpyPG2</i>      | Ppy17g2590.1-F | ATTGCCCTGAGGTTCTTC    |
|                    | Ppy17g2590.1-R | CCATCTGTATTCGGACTTT   |
| <i>PpyPL18.2</i>   | Ppy06g1334.1-F | ATTTATGGGTCCACTGCG    |
|                    | Ppy06g1334.1-R | GCTATTGATTGTAGGGTCTGC |
| <i>PpyWRKY24.1</i> | Ppy01g1216.1-F | CAGATTCCACCCGACATT    |
|                    | Ppy01g1216.1-R | CCGCCTTTCCTTCTATTC    |
| <i>PpyWRKY70</i>   | Ppy01g1522.1-F | ACAGTAGCCTCGGACAAA    |
|                    | Ppy01g1522.1-R | CTGAGATTACAGGGATTAG   |
| <i>PpyCUC1.1</i>   | Ppy06g1884.1-F | CTGGTTGGGATGAAGAAA    |
|                    | Ppy06g1884.1-R | CTGATGGGAGGATGTGGT    |
| <i>PpyMYB67</i>    | Ppy10g1108.1-F | CTCAGATAGCCAAGCATT    |
|                    | Ppy10g1108.1-R | GAGAAGATTGTGGGTGTT    |
| <i>PpyMYB39.2</i>  | Ppy01g0320.1-F | ATACCCAACACCACCAAAA   |
|                    | Ppy01g0320.1-R | CACGGGAGGAGTCACAGA    |
| <i>PpyMYB39.1</i>  | Ppy15g2679.1-F | TCGGACAGACAATGAAAT    |
|                    | Ppy15g2679.1-R | AGAGCTAGAAGATGAGGC    |
| <i>PpyHT4</i>      | Ppy16g1297.1-F | GGCAAGTTGGAGGAAGGA    |
|                    | Ppy16g1297.1-R | GCCGAGTAGAGGGAAGCA    |
| <i>PpyHT2</i>      | Ppy16g1295.1-F | GATTGTTGAGGCAAGTCG    |
|                    | Ppy16g1295.1-R | GCAGAGTAGAGGGAAGCA    |
| <i>PpyHT1</i>      | Ppy13g1850.1-F | TCGGAGATTGCACCCACA    |
|                    | Ppy13g1850.1-R | CAAACCCAGCGATACCCT    |
| <i>PpyHT3</i>      | Ppy16g1296.1-F | GCATCATACACAACCAGA    |
|                    | Ppy16g1296.1-R | AAGTAAGAGCCTCCCAAT    |
| <i>PpyPMEI3</i>    | Ppy11g2629.1-F | TTCTCGTCGTCGCTGGTA    |
|                    | Ppy11g2629.1-R | GCTGTTCGGGTCCTTCTC    |
| <i>PpyPMEI1</i>    | Ppy13g1628.1-F | TTCTGGTGGCAATGGTAG    |
|                    | Ppy13g1628.1-R | GTCTTCTTATAGTCGGTGCG  |
| <i>PpyPMEI4</i>    | Ppy16g1085.1-F | CTTCTGGTGGCGATGCTA    |
|                    | Ppy16g1085.1-R | TCTTTCAAAGTGTCCGAGTT  |

|                    |                |                      |
|--------------------|----------------|----------------------|
| <i>PpyPMEI2</i>    | Ppy13g1629.1-F | ATCAACAATAAGCGTAGCC  |
|                    | Ppy13g1629.1-R | CACTCCCTCCTTCACATAA  |
| <i>PpyPME3</i>     | Ppy09g1413.1-F | CAGACGGCACTGGGAAC    |
|                    | Ppy09g1413.1-R | CTCACCAACCGCAGCAAC   |
| <i>PpyWRKY24.2</i> | Ppy07g1557.1-F | TGGCTCTGCTGGGACTAT   |
|                    | Ppy07g1557.1-R | TTCTTGACGGCTTTCTGT   |
| <i>PpyCUC1.2</i>   | Ppy14g1928.1-F | TGGCTCTGCTGGGACTAT   |
|                    | Ppy14g1928.1-R | TTCTTGACGGCTTTCTGT   |
| <i>PpyMYB86</i>    | Ppy14g1480.1-F | TATGATGGAAACGGAGGA   |
|                    | Ppy14g1480.1-R | TTGGTACGGTGGTATTGA   |
| <i>PpyMYB36</i>    | Ppy15g0537.1-F | CTTGGAGGGAGGTTTAGT   |
|                    | Ppy15g0537.1-R | AGTAGCGGCATAGGGAAT   |
| ACTIN              | PpyPP2A-F      | CTCACGGTTTGTGGCAACTC |
|                    | PpyPP2A-R      | TATGACCACTTCCGCTTCCA |

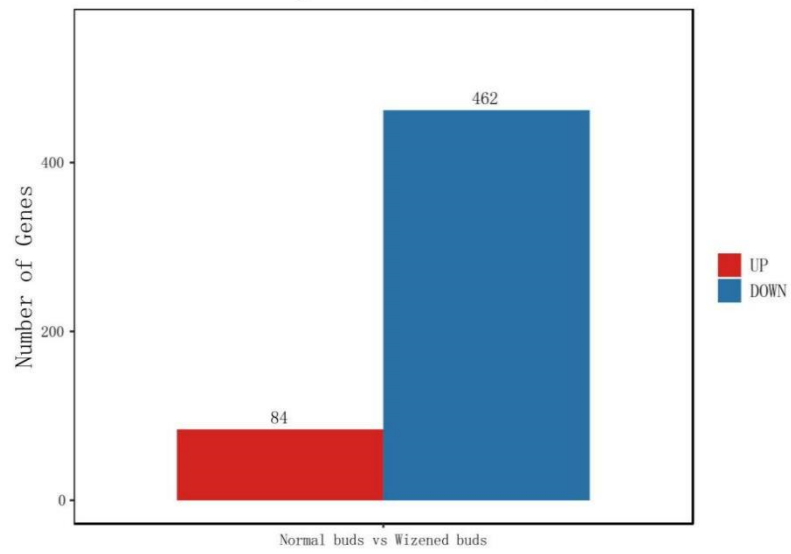

**Figure S1** The number of differentially expressed genes in wizened buds compared with normal buds.
